# Supplementary material for: Global Trends in Research on Cell-Free Nucleic Acids in Obstetrics and Gynecology during 2017–2021
Source: MDPI journal article supplement (doi:10.3390/jcm11195545), 2022-09-22
Supplement: s1 [file s1]

**Supplementary Table S2** Cluster analysis of high-frequency major MeSH terms/MeSH subheadings of cell-free nucleic acids

| Cluster | Number of MeSH terms*                              | Cluster analysis                                                                                                                                                                                                                                                                                                                                                                                                                            |
|---------|----------------------------------------------------|---------------------------------------------------------------------------------------------------------------------------------------------------------------------------------------------------------------------------------------------------------------------------------------------------------------------------------------------------------------------------------------------------------------------------------------------|
| 0       | 29,10,52,65,92,40,27,85,33,51,56,28,4,74,94        | <ol style="list-style-type: none"> <li>1. Colorectal and pancreatic neoplasms genetics: Proto-Oncogene Proteins p21(ras) and B-raf genetics</li> <li>2. Early detection of Cancer: biosensing techniques</li> </ol>                                                                                                                                                                                                                         |
| 1       | 44,12,68,16,21,57,6,78,20,62,18,47,13,2,38         | <ol style="list-style-type: none"> <li>1. DNA methylation and mutational analysis methods: high throughput nucleotide sequencing</li> <li>2. Lung neoplasms drug therapy and antineoplastic agents: protein kinase inhibitors</li> </ol>                                                                                                                                                                                                    |
| 2       | 82,77,39,60,49,1,53,86,5,89,35,46,36,15,54,31,9,66 | <ol style="list-style-type: none"> <li>1. Cell-free nucleic acids sequence analysis for noninvasive prenatal testing</li> <li>2. Cell-free nucleic acids for genetic testing: chromosome disorders, prenatal, pre-eclampsia, Down syndrome diagnosis, Trisomy 13 syndrome and fetus metabolism tests</li> <li>3. Cell-free nucleic acids isolation and purification</li> <li>4. Urinary Bladder Neoplasms genetics and diagnosis</li> </ol> |
| 3       | 67,95,64,26,90,72,75,63,93,48,79,81,88,17,80       | <ol style="list-style-type: none"> <li>1. Melanoma, prostatic, esophageal and stomach neoplasms genetics and diagnosis</li> <li>2. Cell-free nucleic acids metabolism</li> </ol>                                                                                                                                                                                                                                                            |
| 4       | 73,59,37,24,14,30,76,8,83,71,58,69,23,55,19        | <ol style="list-style-type: none"> <li>1. Precision Medicine</li> <li>2. Circulating tumor RNA metabolism and analysis</li> <li>3. Hepatocellular and non-small-cell lung carcinoma genetics and diagnosis</li> </ol>                                                                                                                                                                                                                       |
| 5       | 43,50,7,61,87,84,3,32,22,42,70,34,45,91,25,11,41   | <ol style="list-style-type: none"> <li>1. Circulating neoplastic cells metabolism</li> <li>2. Breast neoplasms genetics and diagnosis</li> <li>3. Exosomes, circulating microRNA and lcnRNA genetics</li> </ol>                                                                                                                                                                                                                             |

#### 4. Coronary artery disease, type 2 diabetes mellitus diagnosis

---

\*Represents the serial number of high-frequency major MeSH terms/MeSH subheadings shown in Supplementary Table 1.
