# Supplementary material for: Global Trends in Research on Cell-Free Nucleic Acids in Obstetrics and Gynecology during 2017–2021
Source: MDPI journal article supplement (doi:10.3390/jcm11195545), 2022-09-22
Supplement: s1 [file s1]

**Supplementary Table S1** High-frequency MeSH terms/MeSH subheadings from the included papers on cell-free nucleic acids

| <b>Rank.</b> | <b>Major MeSH terms/ MeSH subheadings</b>                      | <b>Cluster</b> | <b>Frequency</b> | <b>Proportion of frequency (%)</b> | <b>Cumulative percentage (%)</b> |
|--------------|----------------------------------------------------------------|----------------|------------------|------------------------------------|----------------------------------|
| 1            | Cell-Free Nucleic Acids/blood                                  | 2              | 639              | 3.8538                             | 3.8538                           |
| 2            | Circulating Tumor DNA/genetics                                 | 1              | 572              | 3.4497                             | 7.3035                           |
| 3            | Circulating MicroRNA/blood                                     | 5              | 501              | 3.0215                             | 10.3251                          |
| 4            | Circulating Tumor DNA/blood                                    | 0              | 448              | 2.7019                             | 13.0270                          |
| 5            | Cell-Free Nucleic Acids/genetics                               | 2              | 439              | 2.6476                             | 15.6746                          |
| 6            | Carcinoma, Non-Small-Cell Lung/genetics                        | 1              | 359              | 2.1651                             | 17.8397                          |
| 7            | Circulating MicroRNA/genetics                                  | 5              | 257              | 1.5500                             | 19.3897                          |
| 8            | Liquid Biopsy/methods                                          | 4              | 195              | 1.1760                             | 20.5657                          |
| 9            | Cell-Free Nucleic Acids/analysis                               | 2              | 190              | 1.1459                             | 21.7116                          |
| 10           | Colorectal Neoplasms/genetics                                  | 0              | 157              | 0.9469                             | 22.6585                          |
| 11           | Breast Neoplasms/genetics                                      | 5              | 152              | 0.9167                             | 23.5752                          |
| 12           | Carcinoma, Non-Small-Cell Lung/drug therapy                    | 1              | 131              | 0.7901                             | 24.3652                          |
| 13           | High-Throughput Nucleotide Sequencing/methods                  | 1              | 122              | 0.7358                             | 25.1010                          |
| 14           | Circulating Tumor DNA/analysis                                 | 4              | 118              | 0.7117                             | 25.8127                          |
| 15           | Prenatal Diagnosis/methods                                     | 2              | 117              | 0.7056                             | 26.5183                          |
| 16           | Antineoplastic Combined Chemotherapy Protocols/therapeutic use | 1              | 106              | 0.6393                             | 27.1576                          |
| 17           | Cell-Free Nucleic Acids/metabolism                             | 3              | 103              | 0.6212                             | 27.7788                          |
| 18           | Real-Time Polymerase Chain Reaction/methods                    | 1              | 102              | 0.6152                             | 28.3939                          |
| 19           | Carcinoma, Non-Small-Cell Lung/diagnosis                       | 4              | 96               | 0.5790                             | 28.9729                          |
| 20           | Carcinoma, Non-Small-Cell Lung/blood                           | 1              | 89               | 0.5368                             | 29.5097                          |
| 21           | Carcinoma, Non-Small-Cell Lung/pathology                       | 1              | 87               | 0.5247                             | 30.0344                          |

|    |                                                    |   |    |        |         |
|----|----------------------------------------------------|---|----|--------|---------|
| 22 | Circulating MicroRNA/metabolism                    | 5 | 82 | 0.4945 | 30.5289 |
| 23 | Carcinoma, Hepatocellular/genetics                 | 4 | 81 | 0.4885 | 31.0174 |
| 24 | Early Detection of Cancer/methods                  | 4 | 77 | 0.4644 | 31.4818 |
| 25 | Breast Neoplasms/diagnosis                         | 5 | 74 | 0.4463 | 31.9281 |
| 26 | Prostatic Neoplasms, Castration-Resistant/genetics | 3 | 71 | 0.4282 | 32.3563 |
| 27 | Proto-Oncogene Proteins p21(ras)/genetics          | 0 | 67 | 0.4041 | 32.7604 |
| 28 | Colorectal Neoplasms/blood                         | 0 | 65 | 0.3920 | 33.1524 |
| 29 | Colorectal Neoplasms/diagnosis                     | 0 | 63 | 0.3800 | 33.5324 |
| 30 | Neoplastic Cells, Circulating/pathology            | 4 | 61 | 0.3679 | 33.9002 |
| 31 | Genetic Testing/methods                            | 2 | 57 | 0.3438 | 34.2440 |
| 32 | Exosomes/metabolism                                | 5 | 55 | 0.3317 | 34.5757 |
| 33 | Pancreatic Neoplasms/genetics                      | 0 | 53 | 0.3196 | 34.8954 |
| 34 | Breast Neoplasms/blood                             | 5 | 52 | 0.3136 | 35.2090 |
| 35 | Noninvasive Prenatal Testing/methods               | 2 | 52 | 0.3136 | 35.5226 |
| 36 | Down Syndrome/diagnosis                            | 2 | 50 | 0.3015 | 35.8241 |
| 37 | Cell-Free Nucleic Acids/isolation & purification   | 4 | 48 | 0.2895 | 36.1136 |
| 38 | DNA Mutational Analysis/methods                    | 1 | 46 | 0.2774 | 36.3910 |
| 39 | Cell-Free Nucleic Acids/urine                      | 2 | 45 | 0.2714 | 36.6624 |
| 40 | Proto-Oncogene Proteins B-raf/genetics             | 0 | 45 | 0.2714 | 36.9338 |
| 41 | Breast Neoplasms/drug therapy                      | 5 | 44 | 0.2654 | 37.1992 |
| 42 | Extracellular Vesicles/metabolism                  | 5 | 44 | 0.2654 | 37.4646 |
| 43 | Circulating MicroRNA/analysis                      | 5 | 44 | 0.2654 | 37.7299 |
| 44 | Drug Resistance, Neoplasm/genetics                 | 1 | 44 | 0.2654 | 37.9953 |
| 45 | Breast Neoplasms/pathology                         | 5 | 44 | 0.2654 | 38.2607 |

|    |                                                |   |    |        |         |
|----|------------------------------------------------|---|----|--------|---------|
| 46 | Trisomy 13 Syndrome/diagnosis                  | 2 | 41 | 0.2473 | 38.5079 |
| 47 | Sequence Analysis, DNA/methods                 | 1 | 40 | 0.2412 | 38.7492 |
| 48 | Stomach Neoplasms/genetics                     | 3 | 38 | 0.2292 | 38.9783 |
| 49 | Graft Rejection/diagnosis                      | 2 | 38 | 0.2292 | 39.2075 |
| 50 | Exosomes/genetics                              | 5 | 37 | 0.2231 | 39.4307 |
| 51 | Pancreatic Neoplasms/diagnosis                 | 0 | 37 | 0.2231 | 39.6538 |
| 52 | Colorectal Neoplasms/drug therapy              | 0 | 36 | 0.2171 | 39.8709 |
| 53 | DNA, Mitochondrial/blood                       | 2 | 35 | 0.2111 | 40.0820 |
| 54 | Chromosome Disorders/diagnosis                 | 2 | 35 | 0.2111 | 40.2931 |
| 55 | Carcinoma, Hepatocellular/diagnosis            | 4 | 35 | 0.2111 | 40.5042 |
| 56 | Colorectal Neoplasms/pathology                 | 0 | 34 | 0.2051 | 40.7092 |
| 57 | ErbB Receptors/genetics                        | 1 | 34 | 0.2051 | 40.9143 |
| 58 | RNA, Long Noncoding/genetics                   | 4 | 33 | 0.1990 | 41.1133 |
| 59 | Genomics/methods                               | 4 | 32 | 0.1930 | 41.3063 |
| 60 | Kidney Transplantation/adverse effects         | 2 | 32 | 0.1930 | 41.4993 |
| 61 | Gene Expression Profiling/methods              | 5 | 31 | 0.1870 | 41.6863 |
| 62 | Circulating Tumor DNA/isolation & purification | 1 | 31 | 0.1870 | 41.8732 |
| 63 | Neoplasm Recurrence, Local/diagnosis           | 3 | 31 | 0.1870 | 42.0602 |
| 64 | Prostatic Neoplasms/diagnosis                  | 3 | 30 | 0.1809 | 42.2411 |
| 65 | Circulating Tumor DNA/metabolism               | 0 | 30 | 0.1809 | 42.4220 |
| 66 | Fetus/metabolism                               | 2 | 30 | 0.1809 | 42.6030 |
| 67 | Melanoma/genetics                              | 3 | 30 | 0.1809 | 42.7839 |
| 68 | Protein Kinase Inhibitors/therapeutic use      | 1 | 28 | 0.1689 | 42.9528 |
| 69 | DNA Methylation/genetics                       | 4 | 28 | 0.1689 | 43.1216 |

|    |                                                 |   |    |        |         |
|----|-------------------------------------------------|---|----|--------|---------|
| 70 | RNA, Long Noncoding/blood                       | 5 | 27 | 0.1628 | 43.2845 |
| 71 | Circulating Tumor DNA/cerebrospinal fluid       | 4 | 25 | 0.1508 | 43.4353 |
| 72 | Prostatic Neoplasms/blood                       | 3 | 25 | 0.1508 | 43.5860 |
| 73 | Precision Medicine/methods                      | 4 | 24 | 0.1447 | 43.7308 |
| 74 | Neoplasm Recurrence, Local/blood                | 0 | 23 | 0.1387 | 43.8695 |
| 75 | Ovarian Neoplasms/diagnosis                     | 3 | 23 | 0.1387 | 44.0082 |
| 76 | Liquid Biopsy/standards                         | 4 | 22 | 0.1327 | 44.1409 |
| 77 | Urinary Bladder Neoplasms/genetics              | 2 | 22 | 0.1327 | 44.2736 |
| 78 | Adenocarcinoma of Lung/genetics                 | 1 | 22 | 0.1327 | 44.4062 |
| 79 | Stomach Neoplasms/diagnosis                     | 3 | 22 | 0.1327 | 44.5389 |
| 80 | Extracellular Traps/metabolism                  | 3 | 21 | 0.1267 | 44.6656 |
| 81 | Cell-Free Nucleic Acids/chemistry               | 3 | 21 | 0.1267 | 44.7922 |
| 82 | Urinary Bladder Neoplasms/diagnosis             | 2 | 21 | 0.1267 | 44.9189 |
| 83 | Brain Neoplasms/diagnosis                       | 4 | 20 | 0.1206 | 45.0395 |
| 84 | Coronary Artery Disease/blood                   | 5 | 20 | 0.1206 | 45.1601 |
| 85 | Carcinoma, Pancreatic Ductal/genetics           | 0 | 20 | 0.1206 | 45.2807 |
| 86 | Pre-Eclampsia/diagnosis                         | 2 | 20 | 0.1206 | 45.4014 |
| 87 | Diabetes Mellitus, Type 2/blood                 | 5 | 20 | 0.1206 | 45.5220 |
| 88 | 5-Methylcytosine/analogs & derivatives          | 3 | 19 | 0.1146 | 45.6366 |
| 89 | Whole Genome Sequencing/methods                 | 2 | 19 | 0.1146 | 45.7512 |
| 90 | Prostatic Neoplasms/pathology                   | 3 | 19 | 0.1146 | 45.8657 |
| 91 | Class I Phosphatidylinositol 3-Kinases/genetics | 5 | 19 | 0.1146 | 45.9803 |
| 92 | Biosensing Techniques/methods                   | 0 | 19 | 0.1146 | 46.0949 |
| 93 | Esophageal Neoplasms/genetics                   | 3 | 18 | 0.1086 | 46.2035 |

|    |                    |   |    |        |         |
|----|--------------------|---|----|--------|---------|
| 94 | Melanoma/blood     | 0 | 18 | 0.1086 | 46.3120 |
| 95 | Melanoma/diagnosis | 3 | 18 | 0.1086 | 46.4206 |
